# Supplementary material
Source: Springer Nature journal article supplement (https://www.springermedizin.de/resource/supplementary/12877_2012_827_MOESM4_ESM.pdf/9440482)
Supplement: MOESM4 [file 9440482]

| Walking                               |                                                                                             | Stage | Status                                                                       | Illustration/<br>ICF code                                                                                                                                               |
|---------------------------------------|---------------------------------------------------------------------------------------------|-------|------------------------------------------------------------------------------|-------------------------------------------------------------------------------------------------------------------------------------------------------------------------|
|                                       |                                                                                             | 5     | Using public and/or private transportation                                   |                                                                                      |
| Going out using public transportation | Going out using public transportation (regardless of using assistive devices)               | Yes   | ↑                                                                            |                                                                                                                                                                         |
|                                       |                                                                                             | No    | ↓                                                                            | d4702                                                                                                                                                                   |
|                                       |                                                                                             | 4     | Does not use public transport, but climb stairs.                             |                                                                                      |
| Climbing up                           | Climbing more than 5 stairs                                                                 | Yes   | ↑                                                                            |                                                                                                                                                                         |
|                                       |                                                                                             | No    | ↓                                                                            | d4551a                                                                                                                                                                  |
|                                       |                                                                                             | 3     | Walks without assistance safely (regardless use of cane or other equipments) |   |
| Walking                               | Walking without assistance                                                                  | Yes   | ↑                                                                            |                                                                                                                                                                         |
|                                       |                                                                                             | No    | ↓                                                                            | d450b                                                                                                                                                                   |
|                                       |                                                                                             | 2     | Does not walk but move around within a building                              |                                                                                     |
| Moving around within an institution   | Moving around within a building (regardless of using assistive devices such as wheel chair) | Yes   | ↑                                                                            |                                                                                                                                                                         |
|                                       |                                                                                             | No    | ↓                                                                            | d4601a                                                                                                                                                                  |
|                                       |                                                                                             | 1     | Does not move around within a building.                                      |                                                                                    |
